# Supplementary material
Source: PubMed Central journal article supplement (PMC7773386)
Supplement: jci-131-141500-s387.pdf [file jci-131-141500-s387.pdf]

## Supplemental Material

A

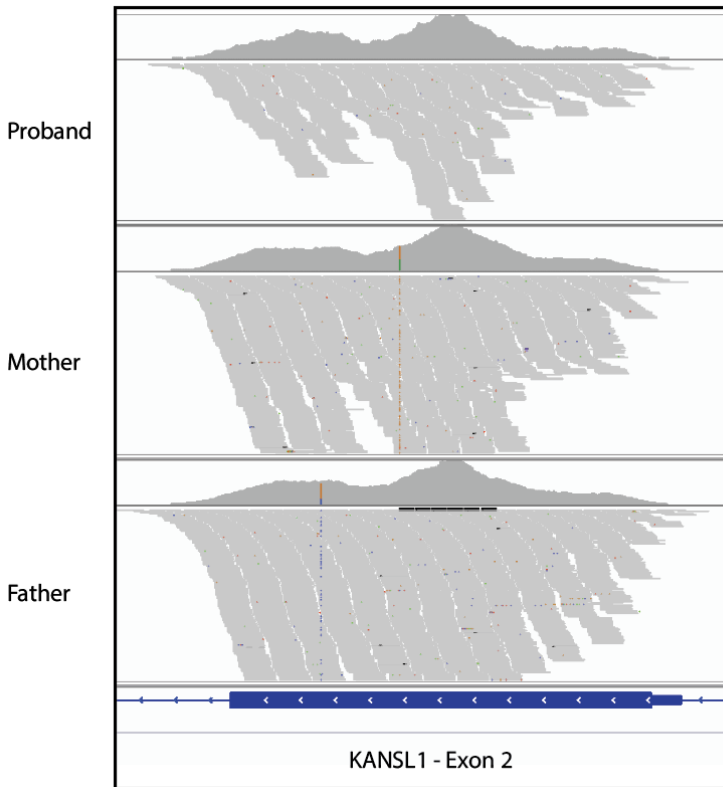

B

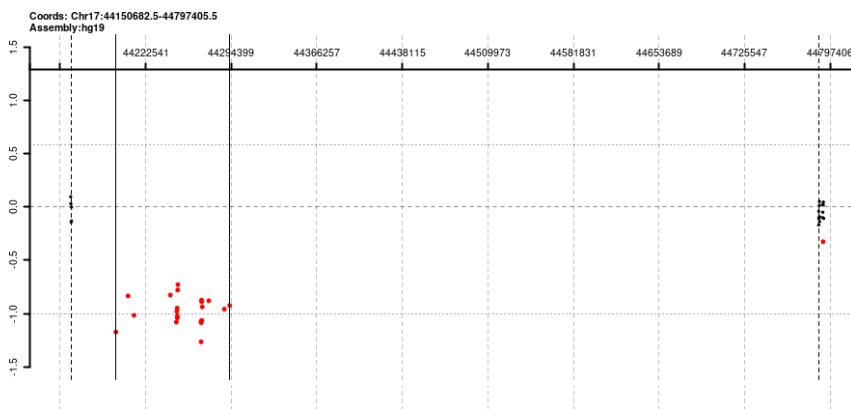

**Supplemental Figure 1. Case 3 - Koolen-de Vries syndrome. (A)** ES coverage plot showing decreased read depth of *KANSL1* exon 2 in proband compared to parents suggestive of a deletion. **(B)** CMA shows evidence of *KANSL1* deletion interpreted as benign due to other similar losses having been seen in the ClinVar and Decipher and reported as benign.

**Supplemental Table 1.** Gene expression statistics by disease gene category and tissue type.

| Gene Class (N)                            | Proportion of Genes with TPM > 10 |      |         | TPM (Mean) |       | TPM (Standard Deviation) |        |
|-------------------------------------------|-----------------------------------|------|---------|------------|-------|--------------------------|--------|
|                                           | FB                                | WB   | p-value | FB         | WB    | FB                       | WB     |
| Aortopathy (25)                           | 0.8                               | 0.24 | < 1E-10 | 452.5      | 12.2  | 1188.4                   | 34.4   |
| Mitochondrial (Nuclear) (202)             | 0.74                              | 0.25 | < 1E-10 | 42.3       | 12.4  | 90.5                     | 40.1   |
| Neuropathy (72)                           | 0.66                              | 0.27 | < 1E-10 | 49.8       | 12.4  | 89.6                     | 35.9   |
| Retinal Dystrophy (8)                     | 0.62                              | 0.25 | < 1E-10 | 16.6       | 5.5   | 13.5                     | 5.9    |
| Skeletal Dysplasia (47)                   | 0.6                               | 0.15 | < 1E-10 | 713.5      | 10.9  | 3078.4                   | 36.9   |
| Autism/Intellectual Disability (104)      | 0.58                              | 0.25 | < 1E-10 | 20.1       | 7     | 27                       | 11.4   |
| Cancer (84)                               | 0.58                              | 0.25 | < 1E-10 | 66.7       | 7.8   | 408.2                    | 13.8   |
| Inborn Errors of Metabolism (93)          | 0.57                              | 0.16 | < 1E-10 | 22.8       | 6.4   | 31.7                     | 11     |
| Central Nervous System Malformation (103) | 0.53                              | 0.13 | < 1E-10 | 123.6      | 34.8  | 604.3                    | 247.8  |
| Congenital Heart Defect (42)              | 0.51                              | 0.22 | < 1E-10 | 42.5       | 6.2   | 141                      | 16     |
| OMIM Disease Genes (4218)                 | 0.46                              | 0.22 | < 1E-10 | 66.3       | 185.9 | 1187                     | 7337.9 |
| Immunodeficiency (207)                    | 0.45                              | 0.58 | < 1E-10 | 45.3       | 56.8  | 322.5                    | 206.7  |
| Cardiomyopathy (50)                       | 0.44                              | 0.14 | < 1E-10 | 43.3       | 6.1   | 89.6                     | 17.1   |
| Epilepsy (146)                            | 0.42                              | 0.15 | < 1E-10 | 18.4       | 6.7   | 52.4                     | 23.4   |
| Exome (19488)                             | 0.4                               | 0.2  | < 1E-10 | 38.3       | 49.8  | 578.9                    | 3441.3 |
| Arrhythmia (39)                           | 0.23                              | 0.18 | < 1E-10 | 60.2       | 12.9  | 203.9                    | 41.1   |

FB: Fibroblasts, WB: Whole Blood, TPM: Transcripts per million. The disease-gene lists were based on panels available from GeneDx and Invitae. OMIM disease genes were downloaded directly from <https://omim.org/downloads> in February 2020. Protein-coding RefSeq genes constituted the exome gene list.

**Supplemental Table 2. Gene expression by tissue for RNA-seq diagnosed cases.**

| Diagnosis (Dx)                                   | Gene           | Sampled Tissue(s) | Fibroblast Expression (TPM) | Blood Expression (TPM) |
|--------------------------------------------------|----------------|-------------------|-----------------------------|------------------------|
| Renpenning syndrome                              | <i>PQBP1</i>   | Blood             | 45.4                        | 30.8                   |
| <i>CLTC</i> -associated ID syndrome              | <i>CLTC</i>    | Fibroblast, Blood | 185.7                       | 26.5                   |
| Koolen-de Vries syndrome                         | <i>KANSL1</i>  | Fibroblast        | 11.1                        | 8.6                    |
| Dopa Responsive Dystonia                         | <i>SPR</i>     | Fibroblast        | 34.2                        | 1.6                    |
| <i>NSD2</i> -associated ID syndrome              | <i>NSD2</i>    | Fibroblast, Blood | 16.4                        | 1.4                    |
| <i>CHASERR</i> -associated syndrome              | <i>CHASERR</i> | Fibroblast        | 20.6                        | 21.8                   |
| Brachydactyly syndrome, type B                   | <i>ROR2</i>    | Fibroblast, Blood | 9.8                         | 0.02                   |
| <i>TBCK</i> -associated Syndromic Encephalopathy | <i>TBCK</i>    | Fibroblast        | 11                          | 0.9                    |
| <i>RPL13</i> -associated SEMD                    | <i>RPL13</i>   | Fibroblast        | 718.2                       | 319.4                  |
| <i>PRUNE1</i> -associated DD syndrome            | <i>PRUNE1</i>  | Fibroblast        | 10.9                        | 9.2                    |
| Noonan-like syndrome                             | <i>LZTR1</i>   | Fibroblast, Blood | 34.5                        | 11.1                   |
| Noonan-like syndrome                             | <i>LZTR1</i>   | Fibroblast, Blood | 34.5                        | 11.1                   |
| Au-Kline syndrome                                | <i>HNRNPK</i>  | Fibroblast, Blood | 520.6                       | 193                    |
| Spastic paraplegia 50                            | <i>AP4M1</i>   | Fibroblast        | 15.3                        | 2.87                   |

Gene expression values in transcripts per million (TPM) according to GTEx for the presented cases solved with RNA-seq. DD – developmental delay, ID – intellectual disability, SEMD – spondyloepimetaphyseal dysplasia

**Supplemental Table 3. Gene expression and splicing outlier counts.**

| Outlier Category                                                        | FB Counts (SD) | WB Counts (SD) |
|-------------------------------------------------------------------------|----------------|----------------|
| High/Low Expression Genes                                               | 2.79 (3.11)    | 3.88 (9.12)    |
| High/Low Expression Genes, OMIM Disease                                 | 0.72 (1.16)    | 0.94 (2.35)    |
| Low Expression Genes, pLI $\geq$ 0.9 or DOMINO $\geq$ 0.8               | 0.35 (0.83)    | 0.18 (0.43)    |
| Low Expression Genes, pLI $\geq$ 0.9 or DOMINO $\geq$ 0.8, OMIM Disease | 0.11 (0.34)    | 0.09 (0.29)    |
| Novel Splicing Events ( $\leq$ 2 Samples Per Junction)                  | 60.7 (51.7)    | 22.5 (24.8)    |
| Novel Splicing Events ( $\leq$ 2 Samples Per Junction), OMIM Disease    | 26.4 (22.9)    | 6.56 (7.28)    |

FB: Fibroblasts, WB: Whole Blood, SD: Standard Deviation. Counts represent the average number of genes or novel splicing events per proband in each category for respective tissues.

## **Members of the Undiagnosed Diseases Network**

Maria T. Acosta  
Margaret Adam  
David R. Adams  
Pankaj B. Agrawal  
Mercedes E. Alejandro  
Justin Alvey  
Laura Amendola  
Ashley Andrews  
Euan A. Ashley  
Mahshid S. Azamian  
Carlos A. Bacino  
Guney Bademci  
Eva Baker  
Ashok Balasubramanyam  
Dustin Baldrige  
Jim Bale  
Michael Bamshad  
Deborah Barbouth  
Pinar Bayrak-Toydemir  
Anita Beck  
Alan H. Beggs  
Edward Behrens  
Gill Bejerano  
Jimmy Bennet  
Beverly Berg-Rood  
Jonathan A. Bernstein  
Gerard T. Berry  
Anna Bican  
Stephanie Bivona  
Elizabeth Blue  
John Bohnsack  
Carsten Bonnenmann  
Devon Bonner  
Lorenzo Botto  
Brenna Boyd  
Lauren C. Briere  
Elly Brokamp  
Gabrielle Brown  
Elizabeth A. Burke  
Lindsay C. Burrage  
Manish J. Butte  
Peter Byers  
William E. Byrd  
John Carey  
Olveen Carrasquillo  
Ta Chen Peter Chang  
Sirisak Chanprasert  
Hsiao-Tuan Chao  
Gary D. Clark

Terra R. Coakley  
Laurel A. Cobban  
Joy D. Cogan  
Matthew Coggins  
F. Sessions Cole  
Heather A. Colley  
Cynthia M. Cooper  
Heidi Cope  
William J. Craigen  
Andrew B. Crouse  
Michael Cunningham  
Precilla D'Souza  
Hongzheng Dai  
Surendra Dasari  
Joie Davis  
Jyoti G. Dayal  
Matthew Deardorff  
Esteban C. Dell'Angelica  
Shweta U. Dhar  
Katrina Dipple  
Daniel Doherty  
Naghmeh Dorrani  
Argenia L. Doss  
Emilie D. Douine  
David D. Draper  
Laura Duncan  
Dawn Earl  
David J. Eckstein  
Lisa T. Emrick  
Christine M. Eng  
Cecilia Esteves  
Marni Falk  
Liliana Fernandez  
Carlos Ferreira  
Elizabeth L. Fieg  
Laurie C. Findley  
Paul G. Fisher  
Brent L. Fogel  
Irman Forghani  
Laure Fresard  
William A. Gahl  
Ian Glass  
Bernadette Gochuico  
Rena A. Godfrey  
Katie Golden-Grant  
Alica M. Goldman  
Madison P. Goldrich  
David B. Goldstein  
Alana Grajewski  
Catherine A. Groden  
Irma Gutierrez

Sihoun Hahn  
Rizwan Hamid  
Neil A. Hanchard  
Kelly Hassey  
Nichole Hayes  
Frances High  
Anne Hing  
Fuki M. Hisama  
Ingrid A. Holm  
Jason Hom  
Martha Horike-Pyne  
Alden Huang  
Yong Huang  
Laryssa Huryn  
Rosario Isasi  
Fariha Jamal  
Gail P. Jarvik  
Jeffrey Jarvik  
Suman Jayadev  
Lefkothea Karaviti  
Jennifer Kennedy  
Dana Kiley  
Isaac S. Kohane  
Jennefer N. Kohler  
Deborah Krakow  
Donna M. Krasnewich  
Elijah Kravets  
Susan Korrick  
Mary Koziura  
Joel B. Krier  
Seema R. Lalani  
Byron Lam  
Christina Lam  
Grace L. LaMoure  
Brendan C. Lanpher  
Ian R. Lanza  
Lea Latham  
Kimberly LeBlanc  
Brendan H. Lee  
Hane Lee  
Roy Levitt  
Richard A. Lewis  
Sharyn A. Lincoln  
Pengfei Liu  
Xue Zhong Liu  
Nicola Longo  
Sandra K. Loo  
Joseph Loscalzo  
Richard L. Maas  
John MacDowall  
Ellen F. Macnamara

Calum A. MacRae  
Valerie V. Maduro  
Marta M. Majcherska  
Bryan C. Mak  
May Christine V. Malicdan  
Laura A. Mamounas  
Teri A. Manolio  
Rong Mao  
Kenneth Maravilla  
Thomas C. Markello  
Ronit Marom  
Gabor Marth  
Beth A. Martin  
Martin G. Martin  
Julian A. Martínez-Agosto  
Shruti Marwaha  
Jacob McCauley  
Allyn McConkie-Rosell  
Colleen E. McCormack  
Alexa T. McCray  
Elisabeth McGee  
Heather Mefford  
J. Lawrence Merritt  
Matthew Might  
Ghayda Mirzaa  
Eva Morava  
Paolo M. Moretti  
Deborah Mosbrook-Davis  
John J. Mulvihill  
David R. Murdock  
Anna Nagy  
Mariko Nakano-Okuno  
Avi Nath  
Stan F. Nelson  
John H. Newman  
Sarah K. Nicholas  
Deborah Nickerson  
Shirley Nieves-Rodriguez  
Donna Novacic  
Devin Oglesbee  
James P. Orengo  
Laura Pace  
Stephen Pak  
J. Carl Pallais  
Christina GS. Palmer  
Jeanette C. Papp  
Neil H. Parker  
John A. Phillips III  
Jennifer E. Posey  
Lorraine Potocki  
Bradley Power



Barbara N. Pusey  
Aaron Quinlan  
Wendy Raskind  
Archana N. Raja  
Deepak A. Rao  
Genecee Renteria  
Chloe M. Reuter  
Lynette Rives  
Amy K. Robertson  
Lance H. Rodan  
Jill A. Rosenfeld  
Natalie Rosenwasser  
Francis Rossignol  
Maura Ruzhnikov  
Ralph Sacco  
Jacinda B. Sampson  
Susan L. Samson  
Mario Saporta  
C. Ron Scott  
Judy Schaechter  
Timothy Schedl  
Kelly Schoch  
Daryl A. Scott  
Vandana Shashi  
Jimann Shin  
Rebecca Signer  
Edwin K. Silverman  
Janet S. Sinsheimer  
Kathy Sisco  
Edward C. Smith  
Kevin S. Smith  
Emily Solem  
Lilianna Solnica-Krezel  
Ben Solomon  
Rebecca C. Spillmann  
Joan M. Stoler  
Jennifer A. Sullivan  
Kathleen Sullivan  
Angela Sun  
Shirley Sutton  
David A. Sweetser  
Virginia Sybert  
Holly K. Tabor  
Amelia L. M. Tan  
Queenie K.-G. Tan  
Mustafa Tekin  
Fred Telischi  
Willia Thorson  
Audrey Thurm  
Cynthia J. Tiff  
Camilo Toro

Alyssa A. Tran  
Brianna M. Tucker  
Tiina K. Urv  
Adeline Vanderver  
Matt Velinder  
Dave Viskochil  
Tiphonie P. Vogel  
Colleen E. Wahl  
Stephanie Wallace  
Nicole M. Walley  
Chris A. Walsh  
Melissa Walker  
Jennifer Wambach  
Jijun Wan  
Lee-kai Wang  
Michael F. Wangler  
Patricia A. Ward  
Daniel Wegner  
Mark Wener  
Tara Wenger  
Katherine Wesseling Perry  
Monte Westerfield  
Matthew T. Wheeler  
Jordan Whitlock  
Lynne A. Wolfe  
Jeremy D. Woods  
Shinya Yamamoto  
John Yang  
Muhammad Yousef  
Diane B. Zastrow  
Wadih Zein  
Chunli Zhao  
Stephan Zuchner
