# Supplementary material
Source: PubMed Central journal article supplement (PMC7773386)
Supplement: jci-131-141500-s389.pdf [file jci-131-141500-s389.pdf]

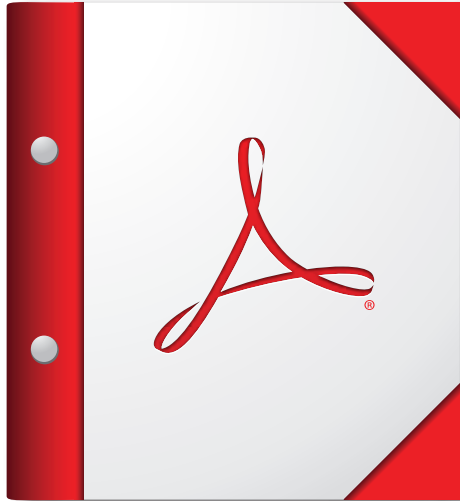

**For the best experience, open this PDF portfolio in  
Acrobat X or Adobe Reader X, or later.**

[Get Adobe Reader Now!](#)
